# Supplementary material for: Healthcare usage and expenditure among people with type 2 diabetes and/or hypertension in Cambodia: results from a cross-sectional survey
Source: HighWire-hosted journal article supplement (doi:10.1136/bmjopen-2022-061959), 2023-01-01
Supplement: bmjopen-2022-061959supp001_data_supplement.pdf [file bmjopen-2022-061959supp001_data_supplement.pdf]

**Legend**

- Provincial boundary
- Administrative district boundary
- District referral hospital
- Studied operational district
- Operational district office

0 30 60 120 Kilometers
